# Supplementary material
Source: PubMed Central journal article supplement (PMC4551272)
Supplement: AEM.01103-15_zam999116521so1.pdf [file AEM.01103-15_zam999116521so1.pdf]

## Supplementary information

### Identification of acyl-homoserine lactone autoinducers produced by the nitrite-oxidizing bacterium *Nitrobacter winogradskyi*.

Brett L. Mellbye<sup>1#</sup>, Peter J. Bottomley<sup>2</sup>, Luis A. Sayavedra-Soto<sup>1#</sup>.

Department of Botany and Plant Pathology, Oregon State University, Corvallis, Oregon, USA<sup>1</sup>; Department of Microbiology, Oregon State University, Corvallis, Oregon, USA<sup>2</sup>

<sup>#</sup>Address correspondence to Brett L. Mellbye, [mellbye@science.oregonstate.edu](mailto:mellbye@science.oregonstate.edu), and Luis A. Sayavedra-Soto, [sayavedl@science.oregonstate.edu](mailto:sayavedl@science.oregonstate.edu).

#### **This PDF file includes:**

Supplementary Methods

Supplementary Table 1

Supplementary Figure 1

Supplementary References

## **SUPPLEMENTAL MATERIALS AND METHODS**

**Fatty acid analysis.** Stationary-phase culture samples were submitted to Microbial ID, Inc. (MIS, Microbial ID, Inc. (MIDI), Newark, Delaware, USA) for fatty acid methyl ester (FAME) generation, extraction, and identification by gas chromatography as described (1). FAME profiles were generated by Microbial ID, Inc. (MIS, Microbial ID, Inc. (MIDI), Newark, Delaware, USA) using Sherlock 6.1 as described (1).

**Table S1.** FAME profile of *Nitrobacter winogradskyi*.

| RT <sup>a</sup> | ECL <sup>b</sup> | Peak Name           | Percent | Comment1 <sup>c</sup> | Comment2 <sup>d</sup> |
|-----------------|------------------|---------------------|---------|-----------------------|-----------------------|
| 0.7395          | 6.6663           | SOLVENT             | ----    |                       |                       |
| 1.6451          | 12.0005          | 12:0                | 0.18    | 0.001                 |                       |
| 2.7604          | 15.8371          | Sum In<br>Feature 3 | 0.38    | -0.003                | 16:1 w7c/<br>16:1 w6c |
| 2.8108          | 15.9981          | 16:0                | 5.89    | -0.002                |                       |
| 3.0667          | 16.8144          | 17:1 w8c            | 0.35    | -0.001                |                       |
| 3.0880          | 16.8825          | 17:1 w6c            | 0.21    | 0.002                 |                       |
| 3.1251          | 17.0008          | 17:0                | 0.20    | 0.001                 |                       |
| 3.3886          | 17.8468          | Sum In<br>Feature 8 | 90.98   | -0.001                | 18:1 w7c              |
| 3.4161          | 17.9349          | 18:1 w5c            | 0.23    | -0.002                |                       |
| 3.4365          | 18.0006          | 18:0                | 1.40    | 0.001                 |                       |
| 3.5883          | 18.4994          | 19:1 iso I          | 0.19    | 0.001                 |                       |
| 3.6864          | 18.8219          |                     | ----    |                       |                       |
| ----            | ----             | Summed<br>Feature 3 | 0.38    | 16:1 w7c/<br>16:1 w6c | 16:1 w6c/<br>16:1 w7c |
| ----            | ----             | Summed<br>Feature 8 | 90.98   | 18:1 w7c              | 18:1 w6c              |

<sup>a</sup>Retention time. <sup>b</sup>Equivalent chain lengths values. <sup>c</sup>ECL deviation or unresolved peak(s) in summed features. <sup>d</sup>Best guess for unresolved peak(s).

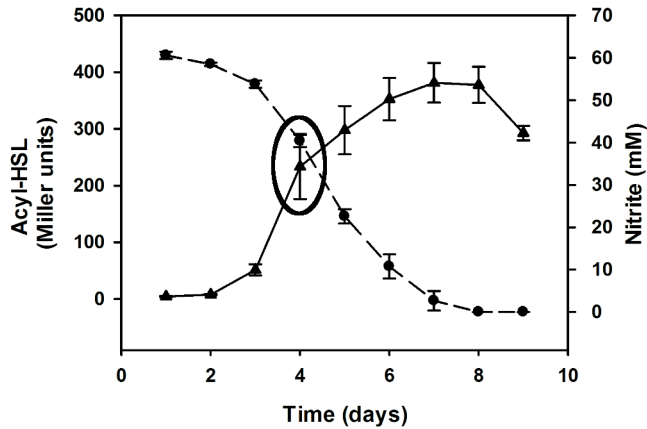

**Figure S1.** Acyl-HSL detection and  $\text{NO}_2^-$  concentration during batch culture. Total acyl-HSL level (triangles, solid line, reported as Miller units; left y-axis) was measured by bioassay after extraction from batch cultures.  $\text{NO}_2^-$  concentration (circles, dashed line, right y-axis) was measured by Griess assay. The circled data points highlight a statistically significant ( $p \leq 0.04$  by two-tailed  $t$ -test) spike in acyl-HSL detection (compared to previous days) that correlates with a transition to a slow growth rate ( $T_d \approx 0.67$  days changes to 1.95 days). Values are the mean of three independent biological replicates. Error bars indicate the standard deviation of the mean.

## SUPPLEMENTAL REFERENCES

1. **Assih EA, Ouattara AS, Thierry S, Cayol JL, Labat M, Macarie H.** 2002. *Stenotrophomonas acidaminiphila* sp. nov., a strictly aerobic bacterium isolated from an upflow anaerobic sludge blanket (UASB) reactor. Int J Syst Evol Microbiol **52**:559-568.
